# Impact of Routine Stenting on Clinical Outcome in Diabetic Patients Undergoing Primary Angioplasty for ST-Segment Elevation Myocardial Infarction

GIUSEPPE DE LUCA, MD  
HARRY SURYAPRANATA, MD  
JORIK TIMMER, MD  
JAN PAUL OTTERVANGER, MD  
ARNOUD W.J. VAN'T HOF, MD

JAN C.A. HOORNTJE, MD  
JAN-HENK DAMBRINK, MD  
A.T. MARCEL GOSSELINK, MD  
MENKO-JAN DE BOER, MD

The benefits of coronary stenting in patients with ST-segment elevation myocardial infarction (STEMI) have been related to a significant reduction in restenosis and target vessel revascularization (TVR) (1–7). However, few data have been reported in patients suffering from diabetes that have been demonstrated to

be associated with in-stent restenosis and worse outcome (8–11). The Zwolle-6 (12) randomized trial investigated the actual role of routine stenting, as compared with balloon angioplasty, in a large cohort of unselected patients with STEMI without exclusion criteria. In this study, we present data in diabetic patients.

Table 1—Clinical and angiographic characteristics according to initial randomization

|                                              | Stent     | Balloon   | P value |
|----------------------------------------------|-----------|-----------|---------|
| n                                            | 84        | 76        |         |
| Age (years)                                  | 65 ± 11   | 64 ± 10   | NS      |
| Female sex                                   | 41.7      | 27.6      | NS      |
| Hypertension                                 | 40.5      | 51.3      | NS      |
| Insulin-dependent diabetes                   | 17.8      | 10.5      | NS      |
| Hypercholesterolemia                         | 29.8      | 22.4      | NS      |
| Door-to-balloon time (min)                   | 57 ± 38   | 54 ± 29   | NS      |
| Ischemia time (min)                          | 341 ± 302 | 312 ± 292 | NS      |
| Killip class 1                               | 90.5      | 89.5      | NS      |
| Anterior myocardial infarction               | 45.2      | 48.7      | NS      |
| Ejection fraction (n = 125)                  | 42 ± 12   | 42 ± 12   | NS      |
| Complete ST-segment resolution (n = 111)     | 37.3      | 48.1      | NS      |
| Multivessel disease                          | 54.8      | 61.8      | NS      |
| Thrombolysis in myocardial infarction pre-3  | 21.4      | 10.5      | NS      |
| Thrombolysis in myocardial infarction post-3 | 85.7      | 85.5      | NS      |
| Myocardial blush grade 2–3                   | 82.1      | 81.6      | NS      |
| Distal embolization                          | 18.9      | 11.9      | NS      |
| Cross-over                                   | 20.2      | 30.3      | NS      |
| Angiographic success                         | 84.5      | 82.9      | NS      |

Data are means ± SD or percent. NS, not significant.

## RESEARCH DESIGN AND METHODS

From April 1997 to October 2001, all patients with STEMI, who were admitted within the first 6 h or between 6 and 24 h if they had persistent symptoms with evidence of ongoing ischemia, were randomized to stenting or balloon angioplasty before the initial angiogram (12). Informed consent was obtained from each patient (or from their relatives in case of patient's inability) before the angiogram. No exclusion criteria was applied. Our study was approved by the institutional review board. After the intervention, all patients received oral aspirin daily, with additional ticlopidine (250 mg/day) or clopidogrel (after June 1999; 300-mg loading dose followed by 75 mg/day) for 4 weeks. Diabetes was considered present if patients were treated with oral hypoglycemic agents or insulin or if the patients had a history of diabetes that was controlled by diet.

Quantitative coronary angiography was analyzed by an independent core laboratory (Diagram, Zwolle, the Netherlands) blinded to all clinical data and outcome. Angiographic success was defined as postprocedural thrombolysis in myocardial infarction 3 flow and a residual stenosis <50%. PredischARGE left ventricular ejection fraction and analysis of ST-segment resolution were performed as previously described (13). All patients were reviewed at outpatient clinic. No patient was lost to follow-up. Routine angiographic follow-up at 6 months was planned in patients enrolled from April 1997 to October 1999. Angiographic restenosis was defined as diameter stenosis of >50% at quantitative coronary angiography.

Statistical analysis was performed with the SPSS 10.0 statistical package. Continuous data were expressed as means ± SD and categorical data as percentage. The ANOVA and the  $\chi^2$  test were appropriately used for continuous and categorical variables, respectively. The difference in event rates between groups during the follow-up period was assessed by the Kaplan-Meier method using the log-rank test.

From the Department of Cardiology, Isala Klinieken, Hospital De Weezenlanden, Zwolle, the Netherlands.

Address correspondence and reprint requests to Harry Suryapranata, MD, Isala Klinieken Hospital De Weezenlanden, Department of Cardiology, Groot Wezenland 20, 8011 JW Zwolle, Netherlands. E-mail: h.suryapranata@diagram-zwolle.nl.

Received for publication 5 October 2005 and accepted in revised form 16 December 2005.

**Abbreviations:** STEMI, ST-segment elevation myocardial infarction; TVR, target vessel revascularization.

A table elsewhere in this issue shows conventional and Système International (SI) units and conversion factors for many substances.

© 2006 by the American Diabetes Association.

The costs of publication of this article were defrayed in part by the payment of page charges. This article must therefore be hereby marked "advertisement" in accordance with 18 U.S.C. Section 1734 solely to indicate this fact.

Table 2—Clinical outcome at 1-year follow-up according initial randomization

|                                               | Overall population |         |                  |         | Patients without cross-over |         |                  |         |
|-----------------------------------------------|--------------------|---------|------------------|---------|-----------------------------|---------|------------------|---------|
|                                               | Stent              | Balloon | RR (95% CI)      | P value | Stent                       | Balloon | RR (95% CI)      | P value |
| n                                             | 84                 | 76      |                  |         | 67                          | 53      |                  |         |
| Death (%)                                     | 10.7               | 9.2     | 1.03 (0.64–1.64) | NS      | 7.5                         | 7.5     | 0.97 (0.26–3.63) | NS      |
| Death and/or repeat myocardial infarction (%) | 14.3               | 11.8    | 1.29 (0.52–3.2)  | NS      | 10.4                        | 11.3    | 1.03 (0.28–3.82) | NS      |
| TVR (%)                                       | 21.4               | 18.4    | 1.27 (0.62–2.62) | NS      | 23.9                        | 20.8    | 1.21 (0.56–2.61) | NS      |
| Major adverse cardiac events (%)              | 32.1               | 25.0    | 1.34 (0.73–2.46) | NS      | 31.3                        | 24.5    | 1.34 (0.67–2.68) | NS      |

RR, relative risk.

**RESULTS**— Diabetes was present in 160 of 1,548 patients (10.3%), 84 randomized to stent and 76 to balloon angioplasty. Baseline characteristics were comparable between the groups, without any difference in terms of distal embolization and/or myocardial perfusion (Table 1). A total of 17 patients (20.2%) randomized to stent underwent cross-over to balloon angioplasty mostly because of unsuitable anatomy, whereas 23 patients (30.3%) initially randomized to balloon angioplasty were finally treated with coronary stenting because of unsatisfactory result or residual dissection after balloon angioplasty (Table 1). As shown in Table 2, no difference in clinical outcome was observed between balloon and stenting at 1 year of follow-up, even after the exclusion of patients who underwent cross-over.

A total of 65 (40.5%) patients underwent scheduled angiographic follow-up. As shown in Table 3, stenting, despite better postprocedural minimal lumen diameter, was not associated with a reduction in restenosis.

**CONCLUSIONS**— Previous randomized trials (1–7) have shown that stenting is superior to balloon angioplasty in terms of restenosis and TVR. However, despite their high-risk features and worse outcome after coronary stenting (8–11),

very few data have been reported in diabetic patients undergoing primary angioplasty for STEMI. Data from the STENT PAMI (Primary Angioplasty in Myocardial Infarction) trial (14) showed that among 135 diabetic patients coronary stenting did not reduce restenosis or improve outcomes compared with balloon angioplasty.

A subanalysis of the CADILLAC (Controlled Abciximab and Device Investigation to Lower Late Angioplasty Complications) trial (15) analyzed the impact of stenting and abciximab in 346 diabetic patients. Stenting was associated with a reduction in TVR, without any benefits in terms of death and reinfarction, whereas abciximab did not improve clinical outcome. However, no data were reported on myocardial perfusion. In fact, diabetes has been shown to be associated with impaired reperfusion (16).

The Zwolle-6 randomized trial (12) addressed the actual role of routine stenting in a large cohort of unselected patients undergoing primary angioplasty, without any exclusion criteria. Furthermore, routine follow-up angiography was scheduled in only a part of patients. Therefore, the results may provide a better insight into daily clinical practice.

In this subanalysis in diabetic patients, we found a similar outcome between stent and balloon in terms of

thrombolysis in myocardial infarction flow, distal embolization, ST-segment resolution, and myocardial blush, all major determinants of mortality (13,17). Differently from the CADILLAC trial (15), but in accordance with the STENT PAMI trial (14), stenting did not improve outcome in terms of restenosis and TVR.

Recent studies in elective patients have shown significant benefits from drug-eluting stents in terms of restenosis and TVR (18–19), particularly in diabetic patients (20–21). In the DIABETES (Diabetes and Sirolimus-Eluting Stent) trial (20), the sirolimus-eluting stent significantly reduced target lesion revascularization from 31.3 to 7.3%. Similar findings were observed in the subanalysis of the TAXUS-IV trial (21), which showed among diabetic patients a significant reduction in TVR (from 24.0 to 11.3%). Even though the reduction in restenosis will not be expected to reduce the incidence of acute coronary events (18–22), drug-eluting stents might determine a further reduction in costs due to reduction in TVR, particularly in patients that have high chances of restenosis, such as those suffering from diabetes (8–9). Although the initial results showed the feasibility of drug-eluting stents for STEMI (23), its safety issue for STEMI remains to be established. Therefore, future randomized studies, without strict inclusion cri-

Table 3—Quantitative angiography in 65 patients undergoing angiographic follow-up

|                                         | Overall population |             |         | Patients without cross-over |             |         |
|-----------------------------------------|--------------------|-------------|---------|-----------------------------|-------------|---------|
|                                         | Stent              | Balloon     | P value | Stent                       | Balloon     | P value |
| n                                       | 31                 | 34          |         | 27                          | 28          |         |
| Reference diameter (mm)                 | 2.89 ± 0.56        | 2.86 ± 0.62 | NS      | 3.08 ± 0.51                 | 2.94 ± 0.5  | 0.004   |
| Minimal lumen diameter (post) (mm)      | 2.38 ± 0.48        | 2.05 ± 0.6  | 0.016   | 2.56 ± 0.42                 | 2.03 ± 0.50 | <0.001  |
| Minimal lumen diameter (follow-up) (mm) | 1.4 ± 0.77         | 1.44 ± 0.73 | NS      | 1.68 ± 0.80                 | 1.52 ± 0.73 | NS      |
| Restenosis >50% (%)                     | 48.4               | 44.1        | NS      | 44.4                        | 50.0        | NS      |
| Restenosis >70% (%)                     | 12.9               | 11.8        | NS      | 11.1                        | 14.3        | NS      |

Data are means ± SD, unless otherwise indicated.

teria, should be conducted to provide safety and cost-benefit analysis of an unrestricted use of drug-eluting stents in diabetic patients undergoing primary angioplasty for STEMI.

### Limitations

Since the benefits of adjunctive glycoprotein IIb/IIIa inhibitors have only been shown recently (21), only 5% of our patients received this additional drug. Our results may have been affected by the relatively high cross-over rate observed in our trial, as a consequence of the absence of exclusion criteria and the early randomization strategy in comparison with previous randomized trials (25). However, our results were confirmed even in the analysis performed excluding patients who underwent cross-over (Table 2). Finally, this was a subanalysis of a large randomized trial and was thus potentially underpowered to detect any difference among the two groups.

### Summary

As compared with balloon angioplasty, routine coronary stenting does not seem to improve clinical outcome in diabetic patients undergoing primary angioplasty for STEMI.

### References

1. Suryapranata H, van't Hof AW, Hoorntje JC, de Boer MJ, Zijlstra F: Randomized comparison of coronary stenting with balloon angioplasty in selected patients with acute myocardial infarction. *Circulation* 97:2502–2505, 1998
2. Antoniucci D, Santoro GM, Bolognese L, Valenti R, Trapani M, Fazzini PF: A clinical trial comparing primary stenting of the infarct-related artery with optimal primary angioplasty for acute myocardial infarction: results from the Florence randomized elective stenting in acute coronary occlusion (FRESCO) trial. *J Am Coll Cardiol* 31:1234–1239, 1998
3. Rodriguez A, Bernardi V, Fernandez M, Mauvecin C, Ayala F, Santaera O, Martinez J, Mele E, Roubin GS, Palacios I, Ambrose JA: In-hospital and late results of coronary stents versus conventional balloon angioplasty in acute myocardial infarction (GRAMI trial). *Am J Cardiol* 81:1286–1291, 1998
4. Grines CL, Cox DA, Stone GW, Garcia E, Mattos LA, Giambartolomei A, Brodie BR, Madonna O, Eijgelshoven M, Lansky AJ, O'Neill WW, Morice MC: Coronary angioplasty with or without stent implantation for acute myocardial infarction: Stent Primary Angioplasty in Myocardial Infarction Study Group. *N Engl J Med* 341:1949–1956, 1999
5. Saito S, Hosokawa G, Tanaka S, Nakamura S: Primary stent implantation is superior to balloon angioplasty in acute myocardial infarction: final results of the primary angioplasty versus stent implantation in acute myocardial infarction (PASTA) trial: PASTA Trial Investigators. *Cathet Cardiovasc Interven* 48:262–268, 1999
6. Zhu MM, Feit A, Chadow H, Alam M, Kwan T, Clark LT: Primary stent implantation compared with primary balloon angioplasty for acute myocardial infarction: a meta-analysis of randomised clinical trials. *Am J Cardiol* 88:297–301, 2001
7. Stone GW, Grines CL, Cox DA, Garcia E, Tcheng JE, Griffin JJ, Guagliumi G, Stuckey T, Turco M, Carroll JD, Rutherford BD, Lansky AJ, the Controlled Abciximab and Device Investigation to Lower Late Angioplasty Complications (CADILLAC) Investigators: Comparison of angioplasty with stenting with or without abciximab, in acute myocardial infarction. *N Engl J Med* 346:957–966, 2002
8. Elezi S, Kastrati A, Pache J, Wehinger A, Hadamitzky M, Dirschinger J, Neumann FJ, Schomig A: Diabetes mellitus and the clinical and angiographic outcome after coronary stent placement. *J Am Coll Cardiol* 32:1866–1873, 1998
9. Kornowski R, Mintz GS, Kent KM, Pichard AD, Satler LF, Bucher TA, Hong MK, Popma JJ, Leon MB: Increased restenosis in diabetes mellitus after coronary interventions is due to exaggerated intimal hyperplasia: a serial intravascular ultrasound study. *Circulation* 95:1366–1369, 1997
10. van der Schaaf RJ, Henriques JP, Wiersma JJ, Koch KT, Baan J Jr, Mulder KJ, Durrer JD, Tijssen JG, Piek JJ, de Winter RJ: Primary PCI for acute STEMI patients with and without diabetes mellitus (Letter). *Heart* 92:118–2006
11. Bolognese L, Carrabba N, Santoro GM, Valenti R, Buonamici P, Antoniucci D: Angiographic findings, time course of regional and global left ventricular function, and clinical outcome in diabetic patients with acute myocardial infarction treated with primary percutaneous transluminal coronary angioplasty. *Am J Cardiol* 91:544–549, 2003
12. Suryapranata H, De Luca G, van't Hof AWJ, et al: Is routine stenting for AMI superior to balloon angioplasty? A randomised comparison in a large cohort of unselected patients. *Heart* 91:641–645, 2005
13. van't Hof AW, Liem A, de Boer MJ, Zijlstra F: Clinical value of 12-lead electrocardiogram after successful reperfusion therapy for acute myocardial infarction. *Lancet* 350:615–619, 1997
14. Mattos LA, Grines CL, Sousa JE, Sousa AG, Stone GW, Cox DA, Garcia E, Morice MC, O'Neill W, Grines L, Boura J: One-year follow-up after primary coronary intervention for acute myocardial infarction in diabetic patients: a substudy of the STENT PAMI trial. *Ar Qbras Cardiol* 77:549–561, 2001
15. Stuckey TD, Stone GW, Cox DA, Tcheng JE, Garcia E, Carroll J, Guagliumi G, Rutherford BD, Griffin JJ, Turco M, Lansky AJ, Mehran R, Fahy M, Brodie BR, Grines CL, the CADILLAC Investigators: Impact of stenting and abciximab in patients with diabetes mellitus undergoing primary angioplasty in acute myocardial infarction (the CADILLAC trial). *Am J Cardiol* 95:1–7, 2005
16. Prasad A, Stone GW, Stuckey TD, Costantini CO, Zimetbaum PJ, McLaughlin M, Mehran R, Garcia E, Tcheng JE, Cox DA, Grines CL, Lansky AJ, Gersh BJ: Impact of diabetes mellitus on myocardial perfusion after primary angioplasty in patients with acute myocardial infarction. *J Am Coll Cardiol* 45:508–514, 2005
17. van't Hof AW, Liem A, Suryapranata H, Hoorntje JC, de Boer MJ, Zijlstra F: Angiographic assessment of myocardial reperfusion in patients treated with primary angioplasty for acute myocardial infarction: Myocardial Blush Grade. *Circulation* 97:2302–2306, 1998
18. Moses JW, Leon MB, Popma JJ, Fitzgerald PJ, Holmes DR, O'Shaughnessy C, Caputo RP, Kereiakes DJ, Williams DO, Teirstein PS, Jaeger JL, Kuntz RE, the SIRIUS Investigators: Sirolimus-eluting stents versus standard stents in patients with stenosis in a native coronary artery. *N Engl J Med* 349:1315–1323, 2003
19. Stone GW, Ellis SG, Cox DA, Hermiller J, O'Shaughnessy C, Mann JT, Turco M, Caputo R, Bergin P, Greenberg J, Popma JJ, Russell ME, the TAXUS-IV Investigators: A polymer-based, paclitaxel-eluting stent in patients with coronary artery disease. *N Engl J Med* 350:221–231, 2004
20. Sabate M, Jimenez-Quevedo P, Angiolillo DJ, Gomez-Hospital JA, Alfonso F, Hernandez-Antolin R, Goicolea J, Banuelos C, Escaned J, Moreno R, Fernandez C, Fernandez-Aviles F, Macaya C, the DIABETES Investigators: Randomized comparison of sirolimus-eluting stent versus standard stent for percutaneous coronary revascularization in diabetic patients: the diabetes and sirolimus-eluting stent (DIABETES) trial. *Circulation* 112:2175–2183, 2005
21. Hermiller JB, Raizner A, Cannon L, Gurbel PA, Kutcher MA, Wong SC, Russell ME, Ellis SG, Mehran R, Stone GW, the TAXUS-IV Investigators: Outcomes with the polymer-based paclitaxel-eluting TAXUS stent in patients with diabetes mellitus: the TAXUS-IV trial. *J Am Coll Cardiol* 45:1172–1179, 2005
22. Arjomand H, Willerson JT, Holmes DR Jr, Bamlet WR, Surabhi SK, Roukoz B, Espinoza A, McClelland RL, McCormick DJ,

- Goldberg S, PRESTO Investigators: Outcome of patients with prior percutaneous revascularization undergoing repeat coronary intervention (from the PRESTO Trial). *Am J Cardiol* 96:741–746, 2005
23. Lemos PA, Saia F, Hofma SH, Daemen J, Ong AT, Arampatzis CA, Hoyer A, McFadden E, Sianos G, Smits PC, van der Giesen WJ, de Feyter P, van Domburg RT, Serruys PW: Short- and long-term clinical benefit of sirolimus-eluting stents compared with conventional bare stents for patients with acute myocardial infarction. *J Am Coll Cardiol* 43:704–708, 2004
  24. De Luca G, Suryapranata H, Stone GW, Antoniucci D, Tcheng JE, Neumann FJ, Van de Werf F, Antman EM, Topol EJ: Abciximab as adjunctive therapy to reperfusion in acute ST-segment elevation myocardial infarction: a meta-analysis of randomized trials. *JAMA* 293:1759–1765, 2005
  25. De Luca G, Suryapranata H, Grimaldi R, Chiariello M: Coronary stenting and abciximab in primary angioplasty for ST-segment-elevation myocardial infarction. *QJM* 98:633–641, 2005
